# Supplementary material for: The exported chaperone Hsp70-x supports virulence functions for Plasmodium falciparum blood stage parasites
Source: PubMed Central journal article supplement (PMC5521827; doi:10.1371/journal.pone.0181656), 2017-07-21

Fig. S1

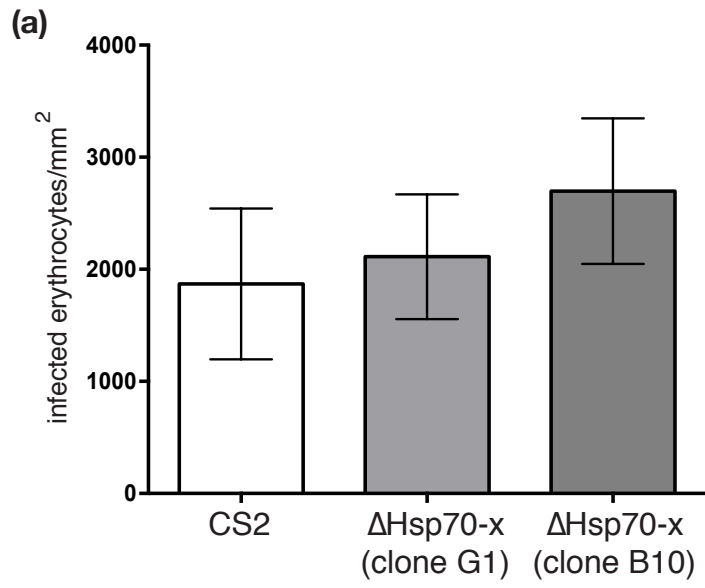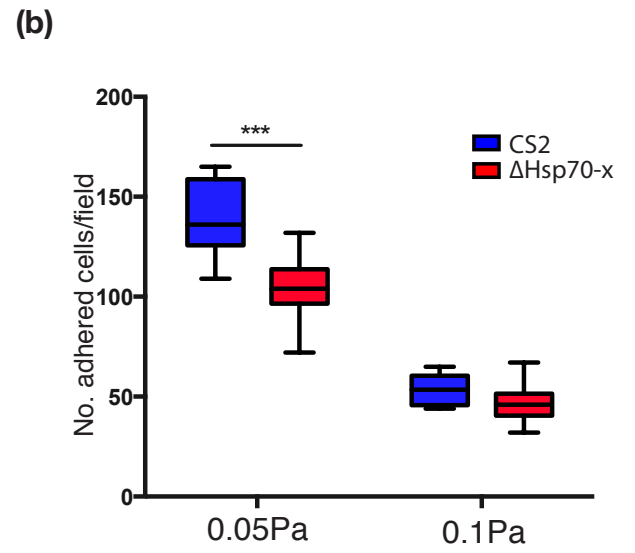

Supplement: pone.0181656.s001.pdf [file pone.0181656.s001.pdf]
