# Supplementary material for: The exported chaperone Hsp70-x supports virulence functions for Plasmodium falciparum blood stage parasites
Source: PLoS One. 2017 Jul 21;12(7):e0181656. doi: 10.1371/journal.pone.0181656 (PMC5521827; doi:10.1371/journal.pone.0181656)
Supplement: S1 Table — Homology, function and export of proteins and genes identified are those corresponding to PlasmoDB Release 29. Proteins are identified being EXPORTED if they contain a PEXEL sequence, or PNEP if known to be exported but lacking a PEXEL sequence. SILAC proteins were designated up-regulated if H/L ratio ≥ 1.25 and down-regulated if ≤ 0.75. Proteins are color coded as per Fig 6 and the number of H and L peptide pair observations are indicated. For RNA-seq, maximal expression at stage sampled determined to be “yes” transcription was 24–36 hpi for trophozoites or 36–0 hpi for schizonts as determined from data available from PlasmoDB. RNA–seq downregulated trophozoite proteins only showing top hits, full data in S3 Table. (XLSX) [file pone.0181656.s003.xlsx]

## Sheet: Differential RNA and protein
UPREGULATED GENES AND PROTEINS							DOWNREGULATED GENES AND PROTEINS
1. RNA seq Trophozoite upregulated proteins							1. RNA seq Trophozoite downregulated proteins
New protein ID	Old protein ID	LogFC	Homology/Function	Exported			New protein ID	Old protein ID	LogFC	Homology/Function	Exported
PF3D7_1371700	MAL13P1.109	3.12981	FIKK13	PEXEL			PF3D7_0401700	PFD0075w	-2.75424	Plasmodium exported protein, unknown function	PEXEL
PF3D7_1371800	MAL13P1.110	3.85563		PNEP			PF3D7_1322600	PF13_0127	-2.61314	unknown
PF3D7_1371900	MAL13P1.465	3.85971		PNEP			PF3D7_1133400	PF11_0344	-2.80876	AMA1
PF3D7_0102000	MAL1P1.11, PFA0100c	4.14733	PHISTa	PNEP			PF3D7_0818100	MAL8P1.70	-3.05746	zinc finger
PF3D7_0102100	MAL1P1.11a, PFA0105w	4.53575	pseudo STEVOR	PNEP			PF3D7_0414800	PFD0715c	-2.80643	unknown
PF3D7_1477900	PF14_0751	2.49445	pseudo acyl-CoA synthetase	no			PF3D7_1231200	PFL1505c	-2.50964	unknown
PF3D7_1372000	MAL13P1.470	3.36104	PHISTa	PEXEL			PF3D7_1440400	PF14_0383	-2.74518	unknown
PF3D7_0832000	MAL7P1.227	1.83428	STEVOR	PEXEL			PF3D7_1022700	PF10_0220	-3.05997	phospholipid scramblase, putative
PF3D7_1372100	MAL13P1.475	1.68973	PHISTb	PEXEL			PF3D7_1436600	PF14_0346	-2.96905	cGMP-dependent protein kinase
							PF3D7_0930200	PFI1470c	-2.74036	leucine-rich repeat protein
							PF3D7_1361500.2	MAL13P1.306	-3.6162	unknown
							PF3D7_1251200	PFL2460w	-2.66304	coronin
							PF3D7_1310700	PF13_0058	-2.67844	unknown
							PF3D7_0209500	PFB0425c	-2.64475	unknown
							PF3D7_0917300	PFI0845w	-3.02755	conserved Plasmodium membrane protein, unknown function
							PF3D7_1007200	PF10_0071	-2.38234	rhoGAP GTPase, putative
							PF3D7_1140400	PF11_0415	-2.92798	unknown
							PF3D7_0800800	MAL8P1.161	-2.77471	Plasmodium exported protein (hyp7), unknown function	PEXEL
							PF3D7_0814400	MAL8P1.91	-1.98547	phospholipase DDHD1, putative
							PF3D7_1431400	PF14_0293	-3.27356	unknown
							PF3D7_0629300	PFF1420w	-2.14981	putative phospholipase
							PF3D7_1222700	PFL1090w	-2.7059	glideosome-associated protein 45
							PF3D7_0424100	PFD1145c	-2.77448	reticulocyte binding protein homologue 5
							PF3D7_0919300	PFI0945w	-2.7666	thioredoxin-like protein 1, putative
							PF3D7_0207800	PFB0350c	-2.40588	serine repeat antigen 3
							PF3D7_0212600	PFB0570w	-2.55105	secreted protein with altered thrombospondin repeat domain
							PF3D7_0221200	PFB0953w	-3.34438	Plasmodium exported protein (hyp15), unknown function	PEXEL
							PF3D7_0625000.2	PFF1210w	-2.39876	sphingomyelin synthase 1, putative
							PF3D7_0828700	MAL8P1.12	-2.50585	unknown
							PF3D7_1126700	PF11_0278	-2.75468	unknown
							PF3D7_0515700	PFE0785c	-2.39698	glideosome-associated protein 40, putative
							PF3D7_0528300	PFE1410c	-3.21579	unknown
2. RNA seq Schizont upregulated proteins							2. RNA seq Schizont downregulated proteins
New protein ID	Old protein ID	LogFC	Homology/Function	Exported			New protein ID	Old protein ID	LogFC	Homology/Function	Exported
PF3D7_1371800	MAL13P1.110	2.48344	Plasmodium exported protein, unknown function	PNEP			PF3D7_1246500	MAL12P1.445, PFL2230c	-3.46487	conserved Plasmodium protein, unknown function
PF3D7_1105000	PF11_0061	2.02874	histone H4	no			PF3D7_0800800	MAL8P1.161	-5.37723	Plasmodium exported protein (hyp7), unknown function	PEXEL
PF3D7_1477800	PF14_0749	2.84146	acyl-CoA binding protein	no			PF3D7_0301000	MAL3P8.9, PFC0050c	-3.94747	acyl-CoA synthetase
PF3D7_1477900	PF14_0751	1.97808	acyl-CoA synthetase, pseudogene	no			PF3D7_0401700	PFD0075w	-2.66518	Plasmodium exported protein, unknown function, pseudogene	PNEP
PF3D7_1371900	MAL13P1.465	2.47709	Plasmodium exported protein, unknown function	PNEP			PF3D7_0221200	PF02_0198, PFB0953w	-3.77529	Plasmodium exported protein (hyp15), unknown function	PEXEL
PF3D7_0102100	MAL1P1.11a, PFA0105w	3.57712	pseudo STEVOR	pseudo PNEP			PF3D7_1335300	MAL13P1.176	-3.98036	reticulocyte binding protein 2 homologue b
PF3D7_1105100	PF11_0062	1.63581	histone H2B	no			PF3D7_0800900	MAL8P1.160	-3.78587	Plasmodium exported protein (hyp7), unknown function, pseudogene	PEXEL
							PF3D7_1131600	PF11_0326	-2.04181	conserved Plasmodium protein, unknown function
							PF3D7_0702000	MAL7P1.6	-1.75041	Plasmodium exported protein (hyp12), unknown function	PEXEL
							PF3D7_1335400	PF13_0198	-4.23829	reticulocyte binding protein 2 homologue a
							PF3D7_0701900	PF07_0004	-1.69122	Plasmodium exported protein, unknown function	PNEP
3. SILAC Trophozoite upreg proteins							3. SILAC Trophozoite downreg proteins
New protein ID	Old protein ID	H/L ratio normalised	Homology/Function	Exported	Observations		New ID	Old ID	H/L ratio normalised	Homology/Function	Exported	Observations
PF3D7_0501000	MAL5P1.11, PFE0050W	2.4	Exported protein, unknown function	PEXEL	3		PF3D7_0707300	MAL7P1.208	0.31	Rhoptry-associated membrane antigen	no	2
PF3D7_0102200	MAL1P1.13, PFA0110W	1.8	Ring-infected erythrocyte surface antigen	PEXEL	7		PF3D7_1410400	MAL7P1.209	0.33	Rhoptry-associated protein 1	no	13
PF3D7_0922600	PFI1110W	1.58	Glutamine synthetase, putative	no	2		PF3D7_0501500	MAL7P1.210	0.33	Rhoptry-associated protein 3	no	4
PF3D7_1006200	PF10_0063	1.57	DNA/RNA-binding protein Alba 3 (Uncharacterized)	no	2		PF3D7_0501600	MAL7P1.211	0.36	Rhoptry-associated protein 2	no	6
PF3D7_0110700	MAL1P2.33, PFA0520C	1.46	Chromatin assembly factor 1 protein WD40 domain, putative	no	2		PF3D7_0115600	MAL7P1.212	0.38	Rifin	no	2
PF3D7_0810600	PF08_0096	1.44	ATP-dependent RNA helicase DBP1, putative	no	2		PF3D7_1338500	MAL7P1.213	0.39	Uncharacterized protein	no	2
PF3D7_1118200	PF11_0188	1.44	Heat shock protein 90, putative	no	3		PF3D7_1228600	MAL7P1.214	0.39	Merozoite surface protein 9	no	9
PF3D7_1149400	PF11_0511	1.43	Plasmodium exported protein (Uncharacterized)	PEXEL	2		PF3D7_0930300	MAL7P1.215	0.4	Merozoite surface protein 1	no	18
PF3D7_0815600	MAL8P1.83	1.41	Eukaryotic translation initiation factor 3 subunit G (eIF3g)	no	4		PF3D7_1335100	MAL7P1.216	0.43	Merozoite surface protein 7	no	6
PF3D7_1353200	PF13_0276	1.41	Membrane associated histidine-rich protein	PNEP	9		PF3D7_0831700	MAL7P1.217	0.43	Heat shock protein 70-x (Hsp70-x)	no	15
PF3D7_0801000	PF08_0137	1.4	Uncharacterized protein (PHISTc)	PEXEL	3		PF3D7_0207500	MAL7P1.218	0.44	Serine repeat antigen 6	no	9
PF3D7_1123900	PF11_0250	1.36	High mobility group-like protein NHP2, putative (Splicing factor)	no	2		PF3D7_0207600	MAL7P1.219	0.44	Serine repeat antigen 5	no	23
PF3D7_0731300	MAL7P1.174	1.36	Uncharacterized protein (PHISTb)	PEXEL	4		PF3D7_0935800	MAL7P1.220	0.44	Cytoadherence linked asexual protein 9	no	4
PF3D7_1351800	PF13_0270	1.34	Uncharacterized protein	no	2		PF3D7_0716300	MAL7P1.221	0.45	Uncharacterized protein	no	2
PF3D7_0532400	MAL5P1.315, PFE1605W	1.32	Lysine-rich membrane-associated PHISTb protein	PEXEL	16		PF3D7_0918400	MAL7P1.222	0.46	Uncharacterized protein	no	3
PF3D7_1134000	PF11_0351	1.31	Heat shock protein 70 homologue	no	35		PF3D7_0207700	MAL7P1.223	0.47	Serine repeat antigen 4	no	2
PF3D7_1124700	PF11_0258	1.3	GrpE protein homolog	no	9		PF3D7_1252100	MAL12P1.496, PFL2505C	0.53	Rhoptry neck protein 3	no	4
PF3D7_1414300	PF14_0141	1.29	60S ribosomal protein L10, putative	no	2		PF3D7_1446600	MAL12P1.496, PFL2505C	0.53	Centrin-2	no	2
PF3D7_1238100	MAL12P1.367, PFL1845C	1.27	Calcyclin binding protein, putative	no	2		PF3D7_0401800	MAL12P1.496, PFL2505C	0.54	Plasmodium exported protein (PHISTb), unknown function	PEXEL	8
PF3D7_1132200	PF11_0331	1.26	T-complex protein 1 subunit alpha	no	4		PF3D7_1246200	MAL12P1.496, PFL2505C	0.54	Actin I	no	17
PF3D7_1434800	PF14_0329	1.25	Mitochondrial acidic protein MAM33, putative	no	2		PF3D7_0905900	MAL12P1.496, PFL2505C	0.54	Coatomer subunit beta, putative	no	2
							PF3D7_1105000	MAL12P1.496, PFL2505C	0.6	Histone H4	no	50
							PF3D7_1105100	PF11_0062	0.6	Histone H2B	no	15
							PF3D7_0918000	PFI0880C	0.61	Glideosome-associated protein 50	no	2
							PF3D7_0202000	PF02_0020, PFB0100C	0.61	Knob-associated histidine-rich protein	PEXEL	4
							PF3D7_1301700	PF02_0020, PFB0100C	0.62	Plasmodium exported protein (hyp8), unknown function	PEXEL	5
							PF3D7_0610400	PF02_0020, PFB0100C	0.62	Histone H3	no	6
							PF3D7_0310400	PF02_0020, PFB0100C	0.62	Parasite-infected erythrocyte surface protein	PEXEL	11
							PF3D7_0501200	PF02_0020, PFB0100C	0.62	Parasite-infected erythrocyte surface protein	PEXEL	5
							PF3D7_1135400	PF02_0020, PFB0100C	0.64	Conserved Plasmodium protein (Uncharacterized)	no	5
							PF3D7_1027300	PF02_0020, PFB0100C	0.66	Merozoite capping protein 1 (Peroxiredoxin)	no	6
							PF3D7_0617800	PF02_0020, PFB0100C	0.66	Histone H2A	no	7
							PF3D7_0929400	PF02_0020, PFB0100C	0.67	High molecular weight rhoptry protein 2	no	26
							PF3D7_0905400	PF02_0020, PFB0100C	0.67	High molecular weight rhoptry protein 3	no	13
							PF3D7_0532300	MAL5P1.314, PFE1600W	0.69	Plasmodium exported protein (PHISTb), unknown function	no	3
							PF3D7_1352500	PF13_0272	0.69	Thioredoxin-related protein, putative	no	7
							PF3D7_0413600	MAL4P1.128, PFD0665C	0.69	26S protease regulatory subunit 6B, putative	no	3
							PF3D7_0320900	MAL3P7.13, PFC0920W	0.69	Histone H2A	no	9
							PF3D7_1201000	MAL12P1.10, PFL0050C	0.71	Plasmodium exported protein (PHISTb), unknown function	no	8
							PF3D7_0302200	MAL3P1.2, PFC0110W	0.71	Cytoadherence linked asexual protein 3.2	no	4
							PF3D7_0714000	PF07_0054	0.72	Histone H2B	no	7
							PF3D7_1108700	PF07_0055	0.72	Heat shock protein DnaJ homologue Pfj2	no	7
							PF3D7_0512600	PF07_0056	0.72	Ras-related protein Rab-1B	no	5
							PF3D7_0817900	MAL8P1.72	0.72	High mobility group protein B2	no	4
							PF3D7_0708800	PF07_0033	0.73	Heat shock protein 110	no	8
							PF3D7_1020900	PF10_0203	0.73	ADP-ribosylation factor	no	3
							PF3D7_1115600	PF11_0164	0.74	Peptidyl-prolyl cis-trans isomerase (PPIase)	no	7
							PF3D7_1136500	PF11_0377	0.74	Casein kinase 1	no	2
							PF3D7_0932200	PFI1565W	0.74	Profilin	no	6
							PF3D7_1220900	MAL12P1.201, PFL1005C	0.75	Chromodomain protein (Heterochromatin protein 1)	no	6
							PF3D7_1129100	PF11_0302	0.75	Parasitophorous vacuolar protein 1 (Uncharacterized)	no	4
							PF3D7_0210000	PF02_0094, PFB0450W	0.75	Sec61 gamma subunit, putative	no	2
